# Supplementary material
Source: publisher site journal article supplement (https://www.dovepress.com/article/284678)
Supplement: Supplementary file 1 [file get_supplementary_file.php]

**APPENDICES**

### Table A1. ICD-9-CM and ICD-10 Codes for COPD

| Code | Type | Description |
| --- | --- | --- |
| 490 | ICD-9 Dx | Bronchitis, not specified as acute or chronic |
| 491.0 | ICD-9 Dx | Simple chronic bronchitis |
| 491.1 | ICD-9 Dx | Mucopurulent chronic bronchitis |
| 491.20 | ICD-9 Dx | Obstructive chronic bronchitis, without exacerbation |
| 491.21 | ICD-9 Dx | Obstructive chronic bronchitis, with (acute) exacerbation |
| 491.22 | ICD-9 Dx | Obstructive chronic bronchitis with acute bronchitis |
| 491.8 | ICD-9 Dx | Other chronic bronchitis |
| 491.9 | ICD-9 Dx | Unspecified chronic bronchitis |
| 492.0 | ICD-9 Dx | Emphysematous bleb |
| 492.8 | ICD-9 Dx | Other emphysema |
| 496 | ICD-9 Dx | Chronic airway obstruction, not elsewhere classified |
| J40 | ICD-10 Dx | Bronchitis, not specified as acute or chronic |
| J41.0 | ICD-10 Dx | Simple chronic bronchitis |
| J41.1 | ICD-10 Dx | Mucopurulent chronic bronchitis |
| J41.8 | ICD-10 Dx | Mixed simple and mucopurulent chronic bronchitis |
| J42 | ICD-10 Dx | Unspecified chronic bronchitis |
| J43.0 | ICD-10 Dx | Unilateral pulmonary emphysema (MacLeod’s syndrome) |
| J43.1 | ICD-10 Dx | Panlobular emphysema |
| J43.2 | ICD-10 Dx | Centrilobular emphysema |
| J43.8 | ICD-10 Dx | Other emphysema |
| J43.9 | ICD-10 Dx | Emphysema, unspecified |
| J44.0 | ICD-10 Dx | Chronic obstructive pulmonary disease with acute lower respiratory infection |
| J44.1 | ICD-10 Dx | Chronic obstructive pulmonary disease with (acute) exacerbation |
| J44.9 | ICD-10 Dx | Chronic obstructive pulmonary disease, unspecified |

### Table A2. ICD-9 CM and ICD-10 Codes for Exclusionary Conditions

| *Asthma* |  |  |
| --- | --- | --- |
| Code | **Code Type** | **Description** |
| 493 | ICD-9 Dx | Asthma |
| 493.00 | ICD-9 Dx | Extrinsic asthma, unspecified |
| 493.01 | ICD-9 Dx | Extrinsic asthma with status asthmaticus |
| 493.02 | ICD-9 Dx | Extrinsic asthma, with (acute) exacerbation |
| 493.10 | ICD-9 Dx | Intrinsic asthma, unspecified |
| 493.11 | ICD-9 Dx | Intrinsic asthma with status asthmaticus |
| 493.12 | ICD-9 Dx | Intrinsic asthma, with (acute) exacerbation |
| 493.20 | ICD-9 Dx | Chronic obstructive asthma, unspecified |
| 493.21 | ICD-9 Dx | Chronic obstructive asthma with status asthmaticus |
| 493.22 | ICD-9 Dx | Chronic obstructive asthma, with (acute) exacerbation |
| 493.81 | ICD-9 Dx | Exercise induced bronchospasm |
| 493.82 | ICD-9 Dx | Cough variant asthma |
| 493.90 | ICD-9 Dx | Asthma, unspecified, unspecified status |
| 493.91 | ICD-9 Dx | Asthma, unspecified with status asthmaticus |
| 493.92 | ICD-9 Dx | Asthma, unspecified, with (acute) exacerbation |
| J45 | ICD-10 Dx | Asthma |
| J4520 | ICD-10 Dx | Mild intermittent asthma, uncomplicated |
| J4521 | ICD-10 Dx | Mild intermittent asthma with (acute) exacerbation |
| J4522 | ICD-10 Dx | Mild intermittent asthma with status asthmaticus |
| J4530 | ICD-10 Dx | Mild persistent asthma, uncomplicated |
| J4531 | ICD-10 Dx | Mild persistent asthma with (acute) exacerbation |
| J4532 | ICD-10 Dx | Mild persistent asthma with status asthmaticus |
| J4540 | ICD-10 Dx | Moderate persistent asthma, uncomplicated |
| J4541 | ICD-10 Dx | Moderate persistent asthma with (acute) exacerbation |
| J4542 | ICD-10 Dx | Moderate persistent asthma with status asthmaticus |
| J4550 | ICD-10 Dx | Severe persistent asthma, uncomplicated |
| J4551 | ICD-10 Dx | Severe persistent asthma with (acute) exacerbation |
| J4552 | ICD-10 Dx | Severe persistent asthma with status asthmaticus |
| J45901 | ICD-10 Dx | Unspecified asthma with (acute) exacerbation |
| J45902 | ICD-10 Dx | Unspecified asthma with status asthmaticus |
| J45909 | ICD-10 Dx | Unspecified asthma, uncomplicated |
| J45990 | ICD-10 Dx | Exercise induced bronchospasm |
| J45991 | ICD-10 Dx | Cough variant asthma |
| J45998 | ICD-10 Dx | Other asthma |
| *Cystic Fibrosis* | |  |
| Code | **Code Type** | **Description** |
| 277.0 | ICD-9 Dx | Cystic fibrosis |
| 277.00 | ICD-9 Dx | Cystic fibrosis without mention of meconium ileus |
| 277.01 | ICD-9 Dx | Cystic fibrosis with meconium ileus |
| 277.02 | ICD-9 Dx | Cystic fibrosis with pulmonary manifestations |
| 277.03 | ICD-9 Dx | Cystic fibrosis with gastrointestinal manifestations |
| 277.09 | ICD-9 Dx | Cystic fibrosis with other manifestations |
| E84 | ICD-10 Dx | Cystic fibrosis |
| E84.0 | ICD-10 Dx | Cystic fibrosis with pulmonary manifestations |
| E84.11 | ICD-10 Dx | Meconium ileus in cystic fibrosis |
| E84.19 | ICD-10 Dx | Cystic fibrosis with other intestinal manifestations |
| E84.8 | ICD-10 Dx | Cystic fibrosis with other manifestations |
| E84.9 | ICD-10 Dx | Cystic fibrosis, unspecified |
| *Lung Cancer* | |  |
| Code | **Code Type** | **Description** |
| 162.2 | ICD-9 Dx | Malignant neoplasm of main bronchus |
| 162.3 | ICD-9 Dx | Malignant neoplasm of upper lobe, bronchus or lung |
| 162.4 | ICD-9 Dx | Malignant neoplasm of middle lobe, bronchus or lung |
| 162.5 | ICD-9 Dx | Malignant neoplasm of lower lobe, bronchus or lung |
| 162.8 | ICD-9 Dx | Malignant neoplasm of other parts of bronchus or lung |
| 162.9 | ICD-9 Dx | Malignant neoplasm of bronchus and lung, unspecified |
| C34 | ICD-10 Dx | Malignant neoplasm of bronchus and lung |
| C340 | ICD-10 Dx | Malignant neoplasm of main bronchus |
| C3400 | ICD-10 Dx | Malignant neoplasm of unspecified main bronchus |
| C3401 | ICD-10 Dx | Malignant neoplasm of right main bronchus |
| C3402 | ICD-10 Dx | Malignant neoplasm of left main bronchus |
| C341 | ICD-10 Dx | Malignant neoplasm of upper lobe, bronchus or lung |
| C3410 | ICD-10 Dx | Malignant neoplasm of upper lobe, unspecified bronchus or lung |
| C3411 | ICD-10 Dx | Malignant neoplasm of upper lobe, right bronchus or lung |
| C3412 | ICD-10 Dx | Malignant neoplasm of upper lobe, left bronchus or lung |
| C342 | ICD-10 Dx | Malignant neoplasm of middle lobe, bronchus or lung |
| C343 | ICD-10 Dx | Malignant neoplasm of lower lobe, bronchus or lung |
| C3430 | ICD-10 Dx | Malignant neoplasm of lower lobe, unspecified bronchus or lung |
| C3431 | ICD-10 Dx | Malignant neoplasm of lower lobe, right bronchus or lung |
| C3432 | ICD-10 Dx | Malignant neoplasm of lower lobe, left bronchus or lung |
| C348 | ICD-10 Dx | Malignant neoplasm of overlapping sites of bronchus and lung |
| C3480 | ICD-10 Dx | Malignant neoplasm of overlapping sites of unspecified bronchus and lung |
| C3481 | ICD-10 Dx | Malignant neoplasm of overlapping sites of right bronchus and lung |
| C3482 | ICD-10 Dx | Malignant neoplasm of overlapping sites of left bronchus and lung |
| C349 | ICD-10 Dx | Malignant neoplasm of unspecified part of bronchus or lung |
| C3490 | ICD-10 Dx | Malignant neoplasm of unspecified part of unspecified bronchus or lung |
| C3491 | ICD-10 Dx | Malignant neoplasm of unspecified part of right bronchus or lung |
| C3492 | ICD-10 Dx | Malignant neoplasm of unspecified part of left bronchus or lung |

Table A3. COPD-related Respiratory Medications and Classes

| **Drug Class** | **Subclass** | **Medication** |
| --- | --- | --- |
| Controller medications | Inhaled long-acting anti-muscarinic  agents (LAMA) | tiotropium  aclidinium  umeclidinium  glycopyrrolate |
| Inhaled LAMA/LABA combination | umeclidinium/vilanterol  tiotropium/olodaterol glycopyrrolate/indacaterol  glycopyrrolate/formoterol |
| Inhaled corticosteroids (ICS) | beclomethasone  betamethasone  budesonide (both inhaler and nebulizer)  ciclensonide  dexamethasone (nebulizer)  flunisolide  fluticasone  mometasone  triamcinolone |
| Long-acting β-agonists (LABA) | arformoterol (nebulizer)  formoterol (oral, nebulizer)  indacaterol (inhaler)  olodaterol (inhaler)  salmeterol (inhaler) |
| Inhaled ICS/LABA combination | fluticasone/salmeterol  budesonide/formoterol  fluticasone/vilanterol  mometasone/formoterol |
| Methylxanthines (all routes) | aminophylline  dyphylline  theophylline |
| PDE-4 inhibitor | roflumilast |
| Rescue  medications | Short-acting β-agonists (SABA) | albuterol (oral, inhaler, nebulizer)  levalbuterol (inhaler, nebulizer) |
| Short-acting anti-muscarinic Agents (SAMA) | ipratropium |
| SAMA/SABA | ipratropium/albuterol |
| Oral corticosteroids (OCS) | betamethasone  cortisone  dexamethasone  hydrocortisone  methylprednisolone  prednisolone  prednisone  triamcinolone |

| **COPD Guideline-recommended Antibiotic Medications** | | |
| --- | --- | --- |
| **Drug Category** | **Drug Class** | **Medication** |
| COPD Guideline-recommended antibiotics* | Cephalosporins | cefaclor  cefdinir  cefepime  cefotaxime  cefotetan  cefoxitin  cefpodoxime  cefprozil  ceftazidime  ceftriaxone  cefuroxime |
| Macrolides | azithromycin  clarithromycin |
| Penicillins | amoxicillin  amoxicillin/potassium clavulanate  piperacillin/tazobactam |
| Quinolones | gemifloxacin  levofloxacin  moxifloxacin |
| Sulfonamide combinations | sulfamethoxazole/trimethoprim |
| Tetracyclines | doxycycline |

*Based on the 2014 VA/DoD Clinical Practice Guideline for the Management of COPD, in which medications are explicitly outlined

Table A4. Variables Related to Treatment Initiation included in IPTW Model

| Variable Category | Variable |
| --- | --- |
| Demographics | Index month/year in three month intervals (e.g., Q3 2015)  Age in years  Gender  Geographic region |
| Clinical characteristics and comorbidities | Pneumonia diagnosis  Pneumonia/bronchitis diagnosis  Quan-Charlson comorbidity index (continuous)  Beta-blocker prescription |
| Prescribing provider specialty | Primary care  Internal medicine  Allied-health professional  Cardiology  Other specialty  Unknown |
| Pharmacy-based respiratory medication use  (excluding the index date) | LABA use  ICS use  ICS/LABA use  Any SABA use (i.e., SABA or SAMA/SABA)  Any SAMA use (i.e., SAMA or SAMA/SABA)  SABA monotherapy use  SAMA monotherapy use  SAMA/SABA use  OCS use  Guideline-recommended antibiotic use  Triple therapy initiation on the index date  Index medication from mail order pharmacy |
| Medical claim-based respiratory medication use (excluding the index date) | LABA use  ICS use  Any SABA use (i.e., SABA or SAMA/SABA)  Any SAMA use (i.e., SAMA or SAMA/SABA)  SABA monotherapy use  SAMA monotherapy use  SAMA/SABA use  OCS use  Guideline-recommended antibiotic use |
| Acute COPD-related exacerbation | Any type of acute COPD-related exacerbation |
| Healthcare costs and utilization (all utilization variables are y/n indicator variables) | All-cause ambulatory visit, office visit, ER visit, inpatient admission, acute inpatient admission, long-term care inpatient admission, intensive care unit admission  All-cause pharmacy (for any medication fill)  COPD-related ambulatory visit, office visit, ER visit, inpatient visit, acute inpatient admission, long-term care inpatient admission  All-cause total costs per patient per month  COPD-related total costs per patient per month |

Table A5. Logistic Regression of Follow-up All-Cause Readmissions

| **Independent Variables** | **Follow-up hospitalizations with a readmission** | | | |
| --- | --- | --- | --- | --- |
| **odds ratio** | **lower 95% CI** | **upper 95% CI** | **p-value** |
| Intercept | – | – | – | 0.031 |
| Index med (cohort) |  |  |  |  |
| LAMA DPI (reference) | ref. | – | – | – |
| LAMA SMI | 0.656 | 0.460 | 0.937 | 0.020 |
| Index date month/year |  |  |  |  |
| 2014 - June 2015 (reference) | ref. | – | – | – |
| Q3 2015 | 0.733 | 0.427 | 1.258 | 0.260 |
| Q4 2015 | 1.212 | 0.749 | 1.960 | 0.434 |
| Q1 2016 | 0.772 | 0.475 | 1.254 | 0.295 |
| Q2 2016 | 0.865 | 0.517 | 1.448 | 0.581 |
| Q3 2016 | 0.569 | 0.319 | 1.013 | 0.055 |
| Q4 2016 | 0.611 | 0.321 | 1.166 | 0.135 |
| Q1 2017 | 1.263 | 0.836 | 1.909 | 0.268 |
| Q2 2017 | 0.759 | 0.472 | 1.222 | 0.256 |
| Q3 2017 | 1.020 | 0.638 | 1.628 | 0.936 |
| Q4 2017 | 1.180 | 0.729 | 1.910 | 0.501 |
| Q1 2018 | 0.869 | 0.523 | 1.446 | 0.590 |
| Q2 2018 | 1.056 | 0.418 | 2.664 | 0.909 |
| Age (continuous) | 1.003 | 0.989 | 1.017 | 0.684 |
| Gender (male) | 1.060 | 0.845 | 1.331 | 0.612 |
| Region |  |  |  |  |
| Northeast | 1.290 | 0.939 | 1.772 | 0.117 |
| Midwest | 1.025 | 0.784 | 1.341 | 0.855 |
| South (reference) | ref. | – | – | – |
| West | 1.075 | 0.690 | 1.676 | 0.749 |
| ***Medication fills - pharmacy claims*** |  |  |  |  |
| LABA free dose | 1.644 | 0.778 | 3.474 | 0.192 |
| ICS free dose | 0.760 | 0.475 | 1.218 | 0.254 |
| ICS/LABA single inhaler combination | 1.035 | 0.800 | 1.340 | 0.792 |
| Any SABA (free dose or combination) | 1.297 | 0.779 | 2.161 | 0.317 |
| SABA free dose | 0.731 | 0.482 | 1.108 | 0.139 |
| SAMA/SABA single inhaler combination | 1.199 | 0.371 | 3.877 | 0.761 |
| Any SAMA (free dose or combination) | 0.871 | 0.262 | 2.895 | 0.822 |
| SAMA free dose | 0.754 | 0.279 | 2.039 | 0.578 |
| Systemic corticosteroids | 0.812 | 0.620 | 1.063 | 0.130 |
| Guideline-recommend respiratory antibiotics | 1.390 | 1.068 | 1.810 | 0.014 |
| ***Medication fills - medical claims*** |  |  |  |  |
| Guideline-recommend respiratory antibiotics | 1.030 | 0.531 | 1.998 | 0.931 |
| LABA free dose | 1.391 | 0.492 | 3.933 | 0.534 |
| ICS free dose | 1.197 | 0.432 | 3.318 | 0.729 |
| Any SABA (free dose or combination) | 2.368 | 0.498 | 11.261 | 0.279 |
| SABA free dose | 0.552 | 0.128 | 2.377 | 0.425 |
| SAMA/SABA single inhaler combination | 0.846 | 0.147 | 4.875 | 0.852 |
| Any SAMA (free dose or combination) | 0.461 | 0.086 | 2.462 | 0.365 |
| SAMA free dose | 2.172 | 0.539 | 8.756 | 0.275 |
| Systemic corticosteroids | 0.968 | 0.751 | 1.248 | 0.804 |
| Baseline Charlson score (continuous) | 1.030 | 0.973 | 1.091 | 0.310 |
| Baseline pneumonia flag | 1.333 | 0.875 | 2.029 | 0.181 |
| Baseline Pneumonia or bronchitis flag | 0.770 | 0.505 | 1.172 | 0.222 |
| Baseline acute COPD-related exacerbation flag | 1.062 | 0.650 | 1.737 | 0.809 |
| Baseline ambulatory flag | 0.510 | 0.150 | 1.737 | 0.282 |
| Baseline ER flag | 1.530 | 0.976 | 2.400 | 0.064 |
| Baseline IP flag | 1.348 | 0.369 | 4.919 | 0.652 |
| Baseline acute IP flag | 0.609 | 0.149 | 2.479 | 0.488 |
| Baseline LTC IP flag | 0.849 | 0.418 | 1.721 | 0.649 |
| Baseline COPD-related ambulatory flag | 1.115 | 0.716 | 1.739 | 0.629 |
| Baseline COPD-related ER flag | 0.934 | 0.665 | 1.311 | 0.694 |
| **Baseline hospitalization (CMS hospitalization eligible for readmission)** | |  |  |  |
| No baseline hospitalizations (reference) | ref. | – | – | – |
| Baseline hospitalization without a readmission | 1.102 | 0.789 | 1.539 | 0.569 |
| Baseline hospitalization with a readmission | 1.727 | 1.094 | 2.726 | 0.019 |
| Baseline COPD-related RX flag | 0.890 | 0.447 | 1.769 | 0.739 |
| Baseline COPD-related acute IP flag | 1.148 | 0.533 | 2.474 | 0.725 |
| Baseline COPD-related LTC IP flag | 1.521 | 0.735 | 3.149 | 0.259 |
| **Baseline total costs, PPPM - Quartiles** |  |  |  |  |
| $0 ≤ baseline total costs ≤ $822.93 | ref. | – | – | – |
| $822.93 < baseline total costs ≤ $1835.73 | 1.362 | 0.865 | 2.143 | 0.182 |
| $1835.73 < baseline total costs ≤ $3833.08 | 1.936 | 1.157 | 3.239 | 0.012 |
| $3833.08 < baseline total costs | 2.385 | 1.313 | 4.330 | 0.004 |
| **Baseline COPD-related total costs, PPPM - Quartiles** |  |  |  |  |
| $0 ≤ baseline COPD-related total costs ≤ $267.72 | ref. | – | – | – |
| $267.72 < baseline COPD-related total costs ≤ $984.07 | 0.684 | 0.436 | 1.075 | 0.100 |
| $984.07 < baseline COPD-related total costs ≤ $2353.20 | 0.612 | 0.346 | 1.084 | 0.092 |
| $2353.20 < baseline COPD-related total costs | 0.537 | 0.276 | 1.044 | 0.067 |
| **Provider specialty** |  |  |  |  |
| Pulmonology (reference) | ref. | – | – | – |
| Primary care | 1.108 | 0.775 | 1.583 | 0.575 |
| Internal medicine | 1.357 | 0.978 | 1.883 | 0.067 |
| Allied Health Professional | 0.630 | 0.047 | 8.453 | 0.728 |
| Cardiology | 1.606 | 0.660 | 3.908 | 0.297 |
| Other/ unknown/ multiple specialty | 1.335 | 0.915 | 1.948 | 0.133 |
| Triple therapy initiation flag | 1.031 | 0.796 | 1.336 | 0.816 |

Observations read = 2,155, Observations used= 2,155
Likelihood ratio: chi-square=119.560, DF=65, p-value=<0.001
Global Score: chi-square=120.877, DF=65, p-value=<0.001
Global Wald: chi-square=135.349, DF=65, p-value=<0.001
Hosmer and Lemeshow: chi-square=16.863, DF=8, p-value=0.032
Generalized R-Square = 0.054, max-rescaled R-Square = 0.087
Pseudo R-Square = 0.057
c statistic = 0.668
AIC-intercept: 2087.580, AIC-intercept and covariates: 2098.020

SC-intercept: 2093.255, SC-intercept and covariates: 2472.606
Specification link test: p-value=0.235

**Appendix Table A6.** Baseline Clinical Characteristics: Medication and Comorbid Conditions

| **Baseline Medication Use‡** | **Pre-IPTW** | | | | | |  | **Post-IPTW** | | | | | |
| --- | --- | --- | --- | --- | --- | --- | --- | --- | --- | --- | --- | --- | --- |
|  | **LAMA DPI (N=22,880)** | | **LAMA SMI (N=5,360)** | | **LAMA DPI vs LAMA SMI p-value*** | **LAMA DPI vs LAMA SMI Stand Diff (%)*** |  | **LAMA DPI (N=22,880)** | | **LAMA SMI (N=5,360)** | | **LAMA DPI vs LAMA SMI p-value**** | **LAMA DPI vs LAMA SMI Stand Diff (%)**** |
|  | **n** | **%** | **n** | **%** |  | **n** | **%** | **n** | **%** |
| ***Pharmacy claims*** |  |  |  |  |  |  |  |  |  |  |  |  |  |
| **Controller medications** |  |  |  |  |  |  |  |  |  |  |  |  |  |
| LAMA free dose | 0 | 0.00 | 0 | 0.00 | – | – |  | 0 | 0.00 | 0 | 0.00 | – | – |
| LABA free dose | 274 | 1.20 | 70 | 1.31 | 0.515 | -0.98 |  | 278 | 1.22 | 68 | 1.27 | 0.779 | -0.50 |
| ICS free dose | 1,170 | 5.11 | 244 | 4.55 | 0.090 | 2.62 |  | 1,150 | 5.02 | 316 | 5.89 | 0.078 | -3.80 |
| LAMA/LABA single inhaler combination | 0 | 0.00 | 0 | 0.00 | – | – |  | 0 | 0.00 | 0 | 0.00 | – | – |
| TIO/OLO | 0 | 0.00 | 0 | 0.00 | – | – |  | 0 | 0.00 | 0 | 0.00 | – | – |
| UMEC/VI | 0 | 0.00 | 0 | 0.00 | – | – |  | 0 | 0.00 | 0 | 0.00 | – | – |
| ICS/LABA single inhaler combination | 6,771 | 29.59 | 2,063 | 38.49 | <0.001 | -18.86 |  | 7,172 | 31.33 | 1,731 | 32.31 | 0.244 | -2.10 |
| Methylxanthines | 232 | 1.01 | 47 | 0.88 | 0.361 | 1.42 |  | 245 | 1.07 | 37 | 0.68 | 0.015 | 4.13 |
| Phosphodiesterase-4 (PDE-4) inhibitors | 149 | 0.65 | 49 | 0.91 | 0.038 | -2.98 |  | 156 | 0.68 | 47 | 0.88 | 0.208 | -2.22 |
| **Rescue medications** |  |  |  |  |  |  |  |  |  |  |  |  |  |
| Any SABA (free dose or combination) | 12,470 | 54.50 | 3,247 | 60.58 | <0.001 | -12.32 |  | 12,740 | 55.66 | 3,060 | 57.10 | 0.126 | -2.89 |
| SABA free dose | 10,647 | 46.53 | 2,830 | 52.80 | <0.001 | -12.55 |  | 10,925 | 47.73 | 2,616 | 48.81 | 0.247 | -2.17 |
| SAMA/SABA single inhaler combination | 3,743 | 16.36 | 987 | 18.41 | <0.001 | -5.42 |  | 3,835 | 16.75 | 933 | 17.40 | 0.361 | -1.73 |
| Any SAMA (free dose or combination) | 4,246 | 18.56 | 1,114 | 20.78 | <0.001 | -5.60 |  | 4,346 | 18.99 | 1,057 | 19.72 | 0.327 | -1.85 |
| SAMA free dose | 678 | 2.96 | 171 | 3.19 | 0.381 | -1.31 |  | 689 | 3.01 | 168 | 3.14 | 0.690 | -0.73 |
| Systemic corticosteroids | 9,355 | 40.89 | 2,525 | 47.11 | <0.001 | -12.56 |  | 9,628 | 42.07 | 2,243 | 41.85 | 0.811 | 0.44 |
| **Guideline-recommend respiratory antibiotics** | 11,832 | 51.71 | 3,058 | 57.05 | <0.001 | -10.73 |  | 12,072 | 52.74 | 2,818 | 52.58 | 0.862 | 0.33 |
| ***Medical claims*** |  |  |  |  |  |  |  |  |  |  |  |  |  |
| **Controller medications** |  |  |  |  |  |  |  |  |  |  |  |  |  |
| LAMA free dose | 1 | 0.00 | 0 | 0.00 | 0.628 | 0.93 |  | 1 | 0.00 | 0 | 0.00 | – | 0.94 |
| LABA free dose | 160 | 0.70 | 48 | 0.90 | 0.130 | -2.21 |  | 169 | 0.74 | 39 | 0.72 | 0.878 | 0.24 |
| ICS free dose | 161 | 0.70 | 47 | 0.88 | 0.182 | -1.96 |  | 168 | 0.73 | 41 | 0.77 | 0.837 | -0.42 |
| Methylxanthines | 222 | 0.97 | 68 | 1.27 | 0.051 | -2.84 |  | 222 | 0.97 | 54 | 1.01 | 0.803 | -0.39 |
| **Rescue medications** |  |  |  |  |  |  |  |  |  |  |  |  |  |
| Any SABA (free dose or combination) | 1,621 | 7.08 | 437 | 8.15 | 0.007 | -4.03 |  | 1,671 | 7.30 | 405 | 7.56 | 0.593 | -0.98 |
| SABA free dose | 924 | 4.04 | 259 | 4.83 | 0.009 | -3.86 |  | 957 | 4.18 | 216 | 4.03 | 0.657 | 0.75 |
| SAMA/SABA single inhaler combination | 791 | 3.46 | 201 | 3.75 | 0.295 | -1.57 |  | 809 | 3.54 | 211 | 3.93 | 0.279 | -2.08 |
| Any SAMA (free dose or combination) | 1,000 | 4.37 | 246 | 4.59 | 0.482 | -1.06 |  | 1,015 | 4.43 | 260 | 4.86 | 0.298 | -2.00 |
| SAMA free dose | 243 | 1.06 | 55 | 1.03 | 0.817 | 0.35 |  | 242 | 1.06 | 59 | 1.10 | 0.816 | -0.44 |
| Systemic corticosteroids | 6,718 | 29.36 | 1,726 | 32.20 | <0.001 | -6.15 |  | 6,843 | 29.90 | 1,579 | 29.47 | 0.602 | 0.94 |
| **Guideline-recommend respiratory antibiotics** | 381 | 1.67 | 94 | 1.75 | 0.650 | -0.68 |  | 384 | 1.68 | 80 | 1.50 | 0.356 | 1.46 |
| ***Baseline inhaler types (excluding the index date) from pharmacy claims* *(pharmacy claims)*** |  |  |  |  |  |  |  |  |  |  |  |  |  |
| DPI | 4,281 | 18.71 | 1,158 | 21.60 | <0.001 | -7.22 |  | 4,504 | 19.68 | 1,003 | 18.72 | 0.172 | 2.43 |
| SMI | 1,295 | 5.66 | 373 | 6.96 | <0.001 | -5.34 |  | 1,317 | 5.75 | 317 | 5.92 | 0.674 | -0.71 |
| ***Baseline nebulized medication use (excluding the index date) from medical and pharmacy claims*** | 6,373 | 27.85 | 1,696 | 31.64 | <0.001 | -8.29 |  | 6,534 | 28.55 | 1,616 | 30.15 | 0.062 | -3.52 |

| **Baseline Comorbidities ‡** | **Pre-IPTW** | | | | | |  | **Post-IPTW** | | | | | |
| --- | --- | --- | --- | --- | --- | --- | --- | --- | --- | --- | --- | --- | --- |
| **LAMA DPI (N=22,880)** | | **LAMA SMI (N=5,360)** | | **LAMA DPI vs LAMA SMI p-value*** | **LAMA DPI vs LAMA SMI Stand Diff (%)*** |  | **LAMA DPI (N=22,880)** | | **LAMA SMI (N=5,360)** | | **LAMA DPI vs LAMA SMI p-value**** | **LAMA DPI vs LAMA SMI Stand Diff (%)**** |
| **n** | **%** | **n** | **%** |  | **n** | **%** | **n** | **%** |
| Allergic rhinitis | 2,280 | 9.97 | 675 | 12.59 | <0.001 | -8.32 |  | 2,359 | 10.31 | 605 | 11.30 | 0.077 | -3.18 |
| Anxiety (narrow) | 5,044 | 22.05 | 1,212 | 22.61 | 0.369 | -1.36 |  | 5,027 | 21.96 | 1,232 | 22.99 | 0.191 | -2.46 |
| Anxiety (broad) | 5,173 | 22.61 | 1,242 | 23.17 | 0.376 | -1.34 |  | 5,155 | 22.52 | 1,257 | 23.45 | 0.241 | -2.20 |
| Arrhythmia | 6,871 | 30.03 | 1,427 | 26.62 | <0.001 | 7.57 |  | 6,737 | 29.43 | 1,459 | 27.23 | 0.010 | 4.90 |
| Atrial fibrillation (narrow) | 4,586 | 20.04 | 975 | 18.19 | 0.002 | 4.71 |  | 4,492 | 19.63 | 974 | 18.17 | 0.046 | 3.71 |
| Atrial fibrillation (broad) | 4,677 | 20.44 | 994 | 18.54 | 0.002 | 4.79 |  | 4,583 | 20.02 | 990 | 18.48 | 0.035 | 3.90 |
| Acute sinusitis | 1,655 | 7.23 | 510 | 9.51 | <0.001 | -8.24 |  | 1,695 | 7.41 | 456 | 8.52 | 0.013 | -4.11 |
| Chronic sinusitis | 1,061 | 4.64 | 242 | 4.51 | 0.701 | 0.59 |  | 1,080 | 4.72 | 217 | 4.06 | 0.059 | 3.23 |
| Chronic rhinitis | 479 | 2.09 | 130 | 2.43 | 0.132 | -2.23 |  | 492 | 2.15 | 112 | 2.09 | 0.796 | 0.43 |
| Congestive heart failure | 6,644 | 29.04 | 1,365 | 25.47 | <0.001 | 8.03 |  | 6,484 | 28.33 | 1,464 | 27.32 | 0.239 | 2.25 |
| Depression | 6,312 | 27.59 | 1,366 | 25.49 | 0.002 | 4.76 |  | 6,249 | 27.30 | 1,449 | 27.03 | 0.757 | 0.61 |
| Diabetes | 8,202 | 35.85 | 1,873 | 34.94 | 0.214 | 1.89 |  | 8,175 | 35.71 | 1,946 | 36.31 | 0.507 | -1.25 |
| Dyspnea | 14,578 | 63.72 | 3,508 | 65.45 | 0.017 | -3.62 |  | 14,575 | 63.68 | 3,457 | 64.51 | 0.356 | -1.73 |
| Hypertension | 18,715 | 81.80 | 4,384 | 81.79 | 0.993 | 0.01 |  | 18,689 | 81.65 | 4,446 | 82.97 | 0.053 | -3.44 |
| Ischemic heart disease | 9,133 | 39.92 | 2,151 | 40.13 | 0.774 | -0.44 |  | 9,100 | 39.76 | 2,139 | 39.92 | 0.865 | -0.32 |
| Metabolic syndrome | 21,033 | 91.93 | 4,968 | 92.69 | 0.064 | -2.85 |  | 21,033 | 91.89 | 5,004 | 93.39 | <0.001 | -5.74 |
| Obesity | 3,940 | 17.22 | 1,020 | 19.03 | 0.002 | -4.70 |  | 3,974 | 17.36 | 993 | 18.53 | 0.104 | -3.04 |
| Hypercholesterolemia | 16,049 | 70.14 | 3,956 | 73.81 | <0.001 | -8.16 |  | 16,087 | 70.29 | 3,936 | 73.46 | <0.001 | -7.06 |
| Hypertension | 18,715 | 81.80 | 4,384 | 81.79 | 0.993 | 0.01 |  | 18,689 | 81.65 | 4,446 | 82.97 | 0.053 | -3.44 |
| Type II diabetes, including insulin resistance | 9,942 | 43.45 | 2,305 | 43.00 | 0.550 | 0.91 |  | 9,935 | 43.40 | 2,373 | 44.28 | 0.349 | -1.76 |
| Myocardial infarction | 2,627 | 11.48 | 543 | 10.13 | 0.005 | 4.35 |  | 2,564 | 11.20 | 558 | 10.42 | 0.182 | 2.52 |
| Osteoporosis | 2,716 | 11.87 | 639 | 11.92 | 0.917 | -0.16 |  | 2,696 | 11.78 | 637 | 11.89 | 0.847 | -0.36 |
| Pulmonary fibrosis | 1,265 | 5.53 | 341 | 6.36 | 0.018 | -3.52 |  | 1,284 | 5.61 | 306 | 5.72 | 0.789 | -0.47 |
| Peripheral vascular disease | 7,491 | 32.74 | 1,664 | 31.04 | 0.017 | 3.64 |  | 7,427 | 32.45 | 1,688 | 31.50 | 0.279 | 2.04 |
| Peptic ulcer/GERD | 6,749 | 29.50 | 1,653 | 30.84 | 0.053 | -2.92 |  | 6,766 | 29.56 | 1,640 | 30.61 | 0.232 | -2.28 |
| Renal disease | 8,039 | 35.14 | 1,733 | 32.33 | <0.001 | 5.93 |  | 7,919 | 34.60 | 1,866 | 34.83 | 0.801 | -0.49 |
| Sleep apnea | 4,060 | 17.74 | 1,140 | 21.27 | <0.001 | -8.90 |  | 4,168 | 18.21 | 1,031 | 19.24 | 0.140 | -2.65 |
| Stroke | 1,448 | 6.33 | 327 | 6.10 | 0.536 | 0.94 |  | 1,403 | 6.13 | 414 | 7.72 | 0.003 | -6.29 |
| Pneumonia or acute bronchitis/bronchiolitis | 8,170 | 35.71 | 1,850 | 34.51 | 0.100 | 2.50 |  | 8,110 | 35.43 | 1,814 | 33.85 | 0.074 | 3.33 |
| Pneumonia | 5,508 | 24.07 | 1,130 | 21.08 | <0.001 | 7.16 |  | 5,367 | 23.45 | 1,177 | 21.96 | 0.063 | 3.55 |
| Smoking evidence | 12,957 | 56.63 | 3,218 | 60.04 | <0.001 | -6.91 |  | 13,031 | 56.93 | 3,134 | 58.49 | 0.096 | -3.16 |

**‡**Medication use was identified using NDC codes for prescription claims and CPT/HCPCS for medical claims during the baseline period, excluding the index date.

* Pre-IPTW: Pearson chi-square test was used for binary and categorical measures. Two-sample t-test was used for continuous measures.
** Post-IPTW: Z-test using robust standard errors was used for binary measures. Rao-Scott chi-square was used for categorical measures. Z-test using robust standard errors in an OLS regression was used for continuous measures
